# Supplementary material for: Optimizing CIGB-300 intralesional delivery in locally advanced cervical cancer
Source: PubMed Central journal article supplement — Br J Cancer. 2015 Apr 16;112(10):1636–43. doi: 10.1038/bjc.2015.137 (PMC4430720; doi:10.1038/bjc.2015.137), 2015-04-16
Supplement: bjc2015137x2.pdf [file bjc2015137x2.pdf]

## Supplementary 2. Pharmacokinetic parameters of unincorporated CIGB-300.

| Parameter              | Group I (35 mg)<br>N = 7 | Group II (70 mg)<br>N = 7 | p (95% CI)        |
|------------------------|--------------------------|---------------------------|-------------------|
| Tmax (h)**             | 0.17 ± 1.36              | 0.02 ± 0.23               | 0.01 (0.1; 2.0)   |
| Cmax (µg/mL)*          | 9.7 ± 12.5               | 14.1 ± 13.9               | 0.85 (-17.0; 6.5) |
| λ (h <sup>-1</sup> )** | 0.33 ± 0.39              | 0.50 ± 0.17               | 0.69 (-0.3; 0.4)  |
| t <sub>1/2</sub> (h)*  | 1.9 ± 0.7                | 1.3 ± 0.6                 | 0.02 (0.1; 1.7)   |
| AUC (µg.h/mL)*         | 17.7 ± 19.6              | 13.9 ± 13.2               | 0.16 (-6.5; 32.0) |
| Vd/F (L/Kg)**          | 0.2 ± 0.6                | 0.1 ± 0.6                 | 0.31 (-0.5; 1.0)  |
| CL/F (L/h.Kg)**        | 0.09 ± 0.46              | 0.11 ± 0.55               | 0.54 (-0.6; 0.6)  |
| MRT (h)*               | 2.7 ± 1.1                | 1.7 ± 1.1                 | 0.18-1.2; 2.2)    |

\*Mean ± standard deviation \*\*Median ± quartile range.

Abbreviation: CI = confidence interval for the differences

p: probability that the difference was > 0
